# Supplementary material
Source: publisher site journal article supplement (https://www.kjim.org/upload/media/kjim-2020-634-suppl5.pdf)
Supplement: Supplementary file 1 [file kjim-2020-634-suppl5.pdf]

**Supplementary Table 5. Cox's regression analysis seeking risk factors for thrombosis occurring after diagnosis of essential thrombocythemia (n = 139)**

| Variable                              | Univariate analysis |            |         | Multivariate analysis |            |         |
|---------------------------------------|---------------------|------------|---------|-----------------------|------------|---------|
|                                       | HR                  | 95% CI     | p value | HR                    | 95% CI     | p value |
| Age > 60 years                        | 0.44                | 0.08–2.34  | 0.334   | -                     | -          | -       |
| Male sex                              | 0.73                | 0.16–3.38  | 0.685   | -                     | -          | -       |
| WBC > 12.0 × 10 <sup>9</sup> /L       | 0.44                | 0.05–3.82  | 0.460   | -                     | -          | -       |
| Platelet > 1,000 × 10 <sup>9</sup> /L | 0.30                | 0.04–2.58  | 0.274   | -                     | -          | -       |
| Positive JAK2V617F                    | 1.90                | 0.20–17.57 | 0.574   | -                     | -          | -       |
| Prior thrombosis                      | 2.79                | 0.59–13.18 | 0.196   | -                     | -          | -       |
| Hypertension                          | 4.83                | 0.92–25.90 | 0.066   | 2.73                  | 0.44–16.80 | 0.278   |
| Diabetes mellitus                     | 1.06                | 0.12–9.29  | 0.961   | -                     | -          | -       |
| Chronic kidney disease                | 9.02                | 1.86–43.84 | 0.006   | 9.02                  | 1.86–43.84 | 0.006   |
| Smoking                               | 0.79                | 0.09–6.88  | 0.831   | -                     | -          | -       |

HR, hazard ratio; CI, confidence interval; WBC, white blood cell; JAK2, Janus kinase 2.
